# Supplementary material for: Effects of Berry Anthocyanins on Cognitive Performance, Vascular Function and Cardiometabolic Risk Markers: A Systematic Review of Randomized Placebo-Controlled Intervention Studies in Humans
Source: MDPI journal article supplement (doi:10.3390/ijms22126482), 2021-06-17
Supplement: s1 [file s1]

## Supplementary information

**Table S1.** The effect of berry anthocyanins on other vascular function-related outcomes, compared to control

| Author (year)                | Intervention                       | Anthocyanin Dose                | cIMT   | eP     | DVP-SI      | DVP-RI      | GTN-mediated dilation | ABI    | LDI-Acetylcholine | LDI-sodium nitroprusside | Total peripheral resistance |
|------------------------------|------------------------------------|---------------------------------|--------|--------|-------------|-------------|-----------------------|--------|-------------------|--------------------------|-----------------------------|
| Ahles (2020) [31]            | Chokeberry extract                 | 16 mg<br>27 mg                  | =<br>= | =<br>= |             |             |                       | =<br>= |                   |                          |                             |
| Castro-Acosta (2016) [37]    | Blackcurrant extract               | 131 mg<br>322 mg<br>599 mg      |        |        | =<br>=<br>= | =<br>=<br>= |                       |        |                   |                          |                             |
| Cook (2017) [40]             | New Zealand blackcurrant extract   | 105 mg<br>210 mg<br>315 mg      |        |        |             |             |                       |        |                   |                          | =<br>↓<br>↓                 |
| Curtis (2019) [43]           | Freeze-dried blueberry powder      | 182 mg; 364 mg                  |        |        |             |             |                       |        |                   |                          |                             |
| Del Bó (2013) [44]           | Blueberry jello                    | 348 mg                          |        |        |             |             |                       |        |                   |                          |                             |
| Del Bó (2017) [45]           | Blueberry juice                    | 309 mg                          |        |        |             |             |                       |        |                   |                          |                             |
| Istas (2019) [46]            | Chokeberry extract and whole fruit | 3.6 mg; 30 mg                   |        |        |             |             |                       |        |                   |                          |                             |
| Jeong (2014) [47]            | Black raspberry extract            | nr                              | =      |        |             |             |                       | =      |                   |                          |                             |
| Jeong (2016) [48]            | Black raspberry extract            | nr (low dose)<br>nr (high dose) |        |        |             |             |                       |        |                   |                          |                             |
| Jeong (2016) [49]            | Black raspberry extract            | nr                              |        |        |             |             |                       |        |                   |                          |                             |
| Jin (2011) [50]              | Blackcurrant juice                 | nr                              |        |        |             |             |                       |        | =                 | =                        |                             |
| Johnson (2015) [51]          | Freeze-dried blueberry powder      | 103 mg #                        |        |        |             |             |                       |        |                   |                          |                             |
| Khan (2014) [52]             | Blackcurrant juice                 | 10 mg<br>37.75 mg               |        |        |             |             | =<br>=                |        |                   |                          |                             |
| McAnulty (2014) [56]         | Blueberry powder                   | nr                              |        |        |             |             |                       |        |                   |                          |                             |
| McAnulty (2019) [57]         | Freeze-dried blueberry powder      | nr                              |        |        |             |             |                       |        |                   |                          |                             |
| Okamoto (2020) [62]          | New Zealand blackcurrant extract   | 210 mg                          |        |        |             |             |                       |        |                   |                          |                             |
| Riso (2013) [65]             | Freeze-dried blueberry powder      | 375 mg                          |        |        |             |             |                       |        |                   |                          |                             |
| Rodriguez-Mateos (2013) [29] | Freeze-dried blueberry powder      | 310 mg<br>517 mg<br>724 mg      |        |        | =<br>=<br>= | =<br>=<br>= |                       |        |                   |                          |                             |

|                              |                               |                                        |
|------------------------------|-------------------------------|----------------------------------------|
|                              | Freeze-dried blueberry powder | 129 mg; 258 mg; 310 mg; 517 mg; 724 mg |
| Rodriguez-Mateos (2014) [66] | Freeze-dried blueberry powder | 196 mg; 339 mg                         |
| Stull (2015) [68]            | Freeze-dried blueberry powder | 290.3 mg                               |
| Tomisawa (2019) [69]         | Blackcurrant extract          | 50 mg                                  |

↑ or ↓ or = indicates statistically significant higher or lower values or no significant change in the intervention group compared to control. # indicates that the value was calculated. Abbreviations: ABI: ankle-brachial index; cIMT: carotid intima media thickness; DVP-RI: digital volume pulse reflection index; DVP-SI: digital volume pulse stiffness index; eP: Peterson equivalent; FMD: flow mediated dilation; GTN: glycerol trinitrate; LDI: laser doppler imaging; nr: not reported; PWV: pulse wave velocity; RHI: reactive hyperemia index.

**Table S2.** The effect of berry anthocyanins on other cardiometabolic risk markers, compared to control.

| Author (year)             | Intervention                       | Anthocyanin Dose       | Blood Pressure (SBP/DBP) |                |           |           | Metabolic markers |       |          |                     |        |          |          |        |
|---------------------------|------------------------------------|------------------------|--------------------------|----------------|-----------|-----------|-------------------|-------|----------|---------------------|--------|----------|----------|--------|
|                           |                                    |                        | Daytime ABP              | Night-time ABP | Awake ABP | Sleep ABP | Apo B/ A1 ratio   | HbA1c | HOMA2-IR | Insulin sensitivity | ox-LDL | LDL/ HDL | TAG/ HDL | TC/HDL |
| Ahles (2020) [31]         | Chokeberry extract                 | 16 mg; 27 mg           |                          |                |           |           |                   |       |          |                     |        |          |          |        |
| Arevström (2019) [32]     | Bilberry powder                    | 90 mg <sup>#</sup>     |                          |                |           |           |                   | =     |          |                     | ↓      |          |          |        |
| Basu (2010) [34]          | Freeze-dried blueberry juice       | 742 mg                 |                          |                |           |           |                   | =     | =        |                     |        |          |          |        |
| Castro-Acosta (2016) [37] | Blackcurrant extract               | 131 mg; 322 mg; 599 mg |                          |                |           |           |                   |       |          |                     |        |          |          |        |
| Cho (2020) [38]           | Black raspberry extract            | nr                     |                          |                |           |           |                   |       |          |                     | =      |          |          |        |
| Cook (2017) [39]          | New Zealand blackcurrant extract   | 210 mg                 |                          |                |           |           |                   |       |          |                     |        |          |          |        |
| Cook (2017) [40]          | New Zealand blackcurrant extract   | 105 mg; 210 mg; 315 mg |                          |                |           |           |                   |       |          |                     |        |          |          |        |
| Cook (2020) [41]          | New Zealand blackcurrant extract   | 210 mg                 |                          |                |           |           |                   |       |          |                     |        |          |          |        |
| Curtis (2009) [42]        | Elderberry extract                 | 500 mg                 |                          |                |           |           |                   |       |          |                     |        |          |          | =      |
| Curtis (2019) [43]        | Freeze-dried blueberry powder      | 182 mg                 |                          |                |           |           |                   |       |          |                     |        |          | =        |        |
| Del Bó (2013) [44]        | Blueberry jello                    | 348 mg                 |                          |                |           |           |                   |       |          |                     |        |          |          |        |
| Del Bó (2017) [45]        | Blueberry juice                    | 309 mg                 |                          |                |           |           |                   |       |          |                     |        |          |          |        |
| Istas (2019) [46]         | Chokeberry extract and whole fruit | 3.6 mg; 30 mg          |                          |                |           |           |                   |       |          |                     |        |          |          |        |
| Jeong (2014) [47]         | Black raspberry extract            | nr                     |                          |                |           |           | =                 |       |          |                     |        | =        | =        | ↓      |
| Jeong (2016) [48]         | Black raspberry extract            | nr (lower dose)        | = / =                    | = / =          |           |           |                   |       |          |                     |        |          |          |        |
|                           |                                    | nr (higher dose)       | = / =                    | ↓ / =          |           |           |                   |       |          |                     |        |          |          |        |
| Jeong (2016) [49]         | Black raspberry extract            | nr                     |                          |                |           |           |                   |       |          |                     |        |          |          |        |
| Johnson (2015) [51]       | Freeze-dried blueberry powder      | 103 mg <sup>#</sup>    |                          |                |           |           |                   |       |          |                     |        |          |          |        |
| Khan (2014) [52]          | Blackcurrant juice                 | 10 mg; 35.75 mg        |                          |                |           |           |                   |       |          |                     |        |          |          |        |
| Loo (2016) [55]           | Chokeberry juice and powder        | 1024 mg                | = / ↓                    | = / =          | ↓? / ↓?   | = / =     | =                 |       |          |                     |        |          |          | =      |
| McAnulty (2014) [56]      | Blueberry powder                   | nr                     |                          |                |           |           |                   |       |          |                     |        |          |          |        |
| McAnulty (2019) [57]      | Freeze-dried blueberry powder      | nr                     |                          |                |           |           |                   |       |          |                     |        |          |          |        |
| Murkovic (2004) [60]      | Elderberry juice                   | 40 mg                  |                          |                |           |           |                   |       |          |                     |        | =        |          | =      |
| Naruszewicz (2007) [61]   | Chokeberry extract                 | 64 mg <sup>#</sup>     |                          |                |           |           |                   |       |          |                     | ↓      |          |          |        |

|                              |                                   |                        |  |   |
|------------------------------|-----------------------------------|------------------------|--|---|
| Okamoto (2020) [62]          | New Zealand blackcurrant extract  | 210 mg                 |  |   |
| Petrovic (2016) [63]         | Chokeberry juice                  | nr                     |  |   |
| Pokimica (2019) [64]         | Chokeberry juice                  | 28.3 mg; 113.3 mg      |  |   |
| Riso (2013) [65]             | Freeze-dried blueberry powder     | 375 mg                 |  |   |
| Rodriguez-Mateos (2013) [29] | Freeze-dried blueberry powder     | 310 mg; 517 mg; 724 mg |  |   |
| Stull (2010) [67]            | Freeze-dried blueberry powder     | 668 mg                 |  | ↑ |
| Stull (2015) [68]            | Freeze-dried blueberry powder     | 290.3 mg               |  |   |
| Whyte (2018) [75]            | Wild blueberry powder and extract | 1.35 mg; 2.7 mg; 7 mg  |  |   |
| Xie (2017) [77]              | Chokeberry extract                | 45.1 mg                |  |   |

↑ or ↓ or = indicates statistically significant higher or lower values or no significant change in the intervention group compared to control. ? indicates a trend. # indicates that the value was calculated; <sup>1</sup> indicates that the dosage was dependent on body weight. Abbreviations: ABP: ambulatory blood pressure; ApoA1: apolipoprotein A1; ApoB: apolipoprotein B; HbA1c: hemoglobin A1C; HOMA2-IR: homeostatic model assessment 2 insulin resistance; DBP: diastolic blood pressure; HDL-C: high-density lipoprotein cholesterol; LDL-C: low-density lipoprotein cholesterol; nr: not reported; ox-LDL-C: oxidized low-density lipoprotein cholesterol; SBP: systolic blood pressure; TAG: triacylglycerol; TC: total cholesterol.
